# Supplementary material for: Investigation of different synthetic routes to and structure–property relationships of poly(m-phenylenevinylene-co-2,5-dioctyloxy-p-phenylenevinylene)Electronic supplementary information (ESI) available: synthesis and characterisation of starting materials 2–5, and FTIR spectra of 6a, 6c, 6d, and 6f. See http://www.rsc.org/suppdata/jm/b2/b208439b/
Source: Royal Society of Chemistry journal article supplement (doi:10.1039/b208439b), 2003-02-04
Supplement: b208439b_1.doc [file b208439b_1.doc]

Synthesis of Starting Materials

1,4-Di-n-octyloxybenzene (2)

Structure **(2)**

Powdered KOH (45.01 g, 0.80 mol) was stirred in 100 mL dimethylsulfoxide (DMSO) for 10 min. *P*-Hydroquinone (22.12 g, 0.20 mol) and octylbromide (77.66 g, 0.40 mol) were added and the resulting brown slurry was stirred for 30 min. It was then poured into 600 mL water and left for at least 1 hour. The waxy product was collected and washed with water until the brown colour had disappeared. After recrystallisation from n-hexane 63.0 g (94%) white flakes were obtained, mp 56-57 oC.

1H-NMR (400 MHz, CDCl3): [ppm] = 0.90-0.93 (t, 6H), 1.31-1.48 (m, 20H), 1.74-1.81 (qui, 4=H), 3.91-3.94 (t, 4H), 6.84 (s, 4H).

13C-NMR (100 MHz, CDCl3): [ppm] = 14.0 (C1), 22.6 (C2), 26.0 (C6), 29.2 - 29.6 (C4, C5, C7), 31.8 (C3), 68.5 (C8), 115.3 (C10), 153.3 (C9).

IR (microscope set-up):  [cm-1] = 717 (m), 773 (m), 825 (m), 1034 (s), 1250 (m), 1285 (m), 1398 (w), 1470 (m), 1511 (m), 1639 (m), 1859 (m), 2863 (s), 2934 (s), 2955 (s).

2,5-Di-n-octyloxy-1, 4-bis(bromomethyl)benzene (3)

Structure (**3**)

A mixture of 1,4-dioctyloxybenzene (18.75 g, 56 mmol), paraformaldehyde (24.0 g, 0.80 mol) and potassium bromide (36.0 g, 0.3 mol) was heated to 80 C in 400 mL acetic acid. Then a mixture of 40 mL acetic acid and 30 mL sulphuric acid was added drop wise (over 30 min) and the reaction mixture stirred for an additional 5 hours at 80 C. After standing overnight, the resulting creamy coloured crystals were collected and washed with water until the smell of acetic acid had disappeared. They were then dried and recrystallised from n-hexane to give 22.42 g (77%) white needles, mp 87-88 C.

Elemental: C24H40Br2O2 (334.54)

Calc. C 55.39 H 7.75 Br 30.71

Found C 55.48 H 7.69 Br 30.89

1H-NMR (400 MHz, CDCl3):  [ppm] = 0.91- 0.94 (t, 6H), 1.33-1.54 (m, 20H), 1.82-1.86 (qui, 4H) 3.99-4.02 (t, 4H), 4.55 (s, 4H), 6.88 (s, 2H).

13C-NMR (100MHz, CDCl3):  [ppm] = 14.1 (C1), 22.6 (C2), 26.1(C6), 28.7 (C7), 29.2-29.3 (C4, C5) 31.8 (C3), 69.1 (C8), 114.7 (C10), 127.6 (C11), 150.7 (C9).

IR (microscope set-up):  [cm-1] = 702 (w), 1029 (w), 1203 (m), 1311 (w), 1398 (w), 1413 (w), 1465 (w), 1511 (m), 2863 (m), 2914 (s), 3027 (w).

2,5-Di-n-octyloxy-1, 4-xylene-bis (triphenylphosphonium bromide) (4)

Structure (4)

A mixture of 1,4-bis(bromomethyl)-2,5-di-n-octyloxybenzene (9.36 g, 18 mmol) and triphenylphosphine (9.47 g, 36 mmol) in dry toluene (240 mL) was heated at 90 C for 2 hours. After cooling the toluene was decanted off and the residual yellow oil was refluxed in diethyl ether (110 mL) for 30 min. The crystalline product was dried under vacuum to give 16.93 g (90%) white crystals, mp = 230-232 C.

Elemental: C60H70O2Br2P2(520.39)

Calc. C 68.96 H 6.75 P 5.93 Br 15.29

Found C 68.80 H 6.76 P 5.71 Br 15.09

1H-NMR (400 MHz, CDCl3):  [ppm] = 0.85-0.89 (t, 6H), 1.02-1.29 (m, 24H), 2.98-3.00 (t, 4H), 5.26-5.29 (d, 4H), 6.71 (s, 2H), 7.57-7.77 (m, 30H).

13C-NMR (100 MHz, CDCl3):  [ppm] = 13.7 (C1), 22.3 (C2), 25.5 (C6), 28.3-28.9 (C4, C5, C7), 31.4 (C3), 67.7 (C8), 115.7-115.9, 116.8, 118.5, 128.8, 129.9, 134.0-134.7 (C14-18), 150.3 (C9).

IR (microscope set-up):  [cm-1] = 691 (m), 718 (w), 744 (w), 835 (w), 868 (w), 949 (w), 995 (w), 1040 (w), 1111 (m), 1122 (m), 1159 (w), 1222 (m), 1316 (w), 1397 (w), 1423 (w), 1437 (m), 1468 (w), 1483 (w), 1518 (m), 1586 (w), 1616 (w), 2763 (m), 2855 (m), 2923 (m), 2951 (m), 3004 (w), 3056 (w), 3389 (w), 3422 (m), 3485 (s), 3655 (w), 3559 (m).

2,5-Di-n-octlyoxy-1, 4-xylene-bis (diethylphosphonate)-ester (5)

Structure (**5**)

A mixture of 1,4-*bis* (bromomethyl)-2,5-di-n-octyloxybenzene (26.02 g, 50 mmol) and triethylphosphite (16.62 g, 100 mmol) was slowly heated to 150 C while the by-product ethyl bromide was continuously removed by distillation. Residual ethyl bromide in the product was removed by rotary evaporation at 40 C for 1 hour. The waxy solid was recrystallised in petroleum ether (40-60 C) and 25.39 g (80%) white crystals collected, mp = 51-52 C.

Elemental: C32H60O8P2 (634.770)

Calc. C 60.55 H 9.53 P 9.76

Found C 60.55 H 9.49 P 9.62

1H-NMR (400 MHz, CDCl3):  [ppm] = 0.88-0.89 (t, 6H), 1.22-1.49 (m, 32H), 1.69-1.75 (qui, 4H), 3.20-3.26 (d, 4H), 3.87-4.02 (t, 12H), 6.88 (s, 2H).

13C-NMR (100 MHz, CDCl3):  [ppm] = 13.5 (C1), 15.8 (C14), 22.2 (C2), 25.1 (C6), 25.6 (C7), 26.5 (12), 28.7-29.0 (C4, C5), 31.3 (C3), 61.3 (C13), 68.5 (C8), 113.8-114.5 (C10), 119.0 (C11), 150.0 (C9).

31P-NMR (162 MHz, CDCl3) [ppm]: 28.39.

IR (microscope set-up):  [cm-1] = 722 (m), 768 (m), 809 (m), 968 (s), 1065 (s), 1229 (s), 1280 (s), 1393 (m), 1419 (s), 1480 (s), 1499 (m), 1731 (w), 2868 (s), 2996 (s).
